# Supplementary material
Source: PubMed Central journal article supplement (PMC6121969)
Supplement: zam018188729s1.pdf [file zam018188729s1.pdf]

# CRISPR-Cpf1 assisted multiplex genome editing and transcriptional repression in *Streptomyces*

Lei Li, Keke Wei, Guosong Zheng, Xiaocao Liu, Shaoxin Chen, Weihong Jiang\* and Yinhua Lu\*

## Supplementary materials

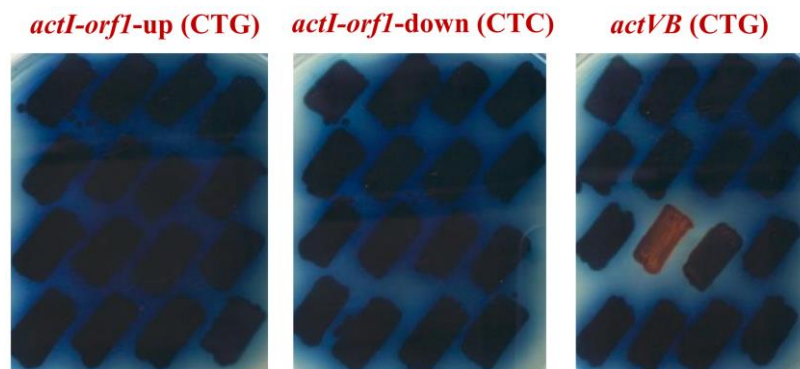

**Fig. S1.** Phenotypic analysis of exoconjugants in which 5'-CTV-3' PAM-targeted crRNAs were used to guide the cleavage of *actI-orf1* or *actVB*. The strains with *actI-orf1* or *actVB* inactivation only produced red-pigmented RED on R2YE plates (imaged at 72 h). 15 random exoconjugants were randomly picked for visual inspections and the strain in the top right corner represented the wild type in each group.

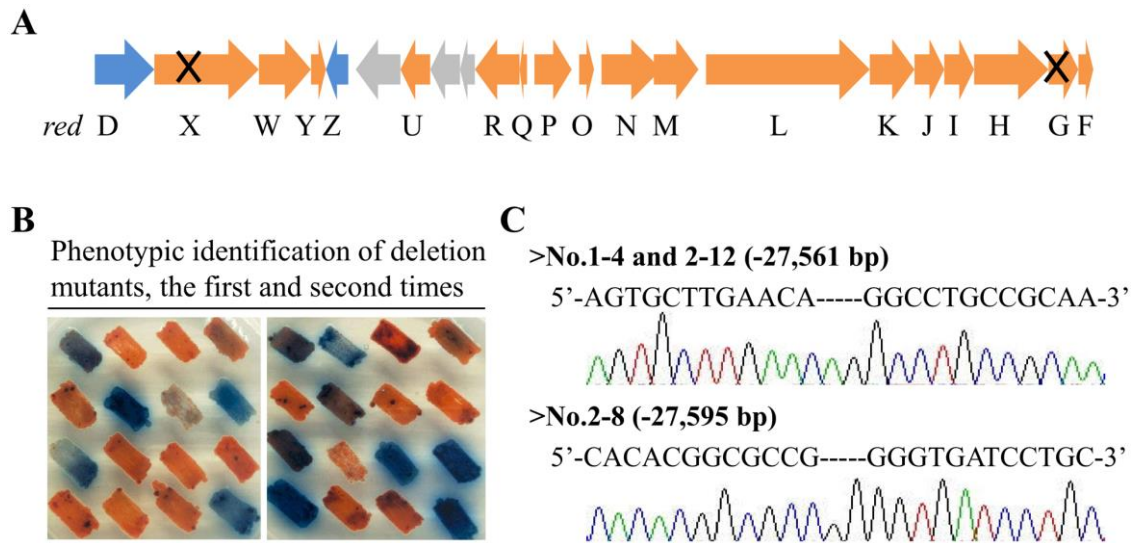

**Fig. S2. One-step deletion of the prodiginines (RED) biosynthetic gene cluster (BGC) by *FnCpf1*-based reconstituted NHEJ editing system.** (A) The map of the RED biosynthetic gene cluster. Two “X” marks represent the cleavage sites of CRISPR-Cpf1 system. (B) Phenotypic identification of the mutants with deletion of the RED BGC. For each trial, 15 colonies were selected. The images were photographed after growth on R2YE plates for 48 h at 30 °C. The strain on the top right corner represents the wild-type *S. coelicolor* M145. These strains in which the RED BGC has been broken or completely deleted only produce blue-pigmented actinorhodin (ACT). (C) Sequence analysis of the mutants with deletion of the RED BGC. The numbers in brackets represent the deleted lengths.

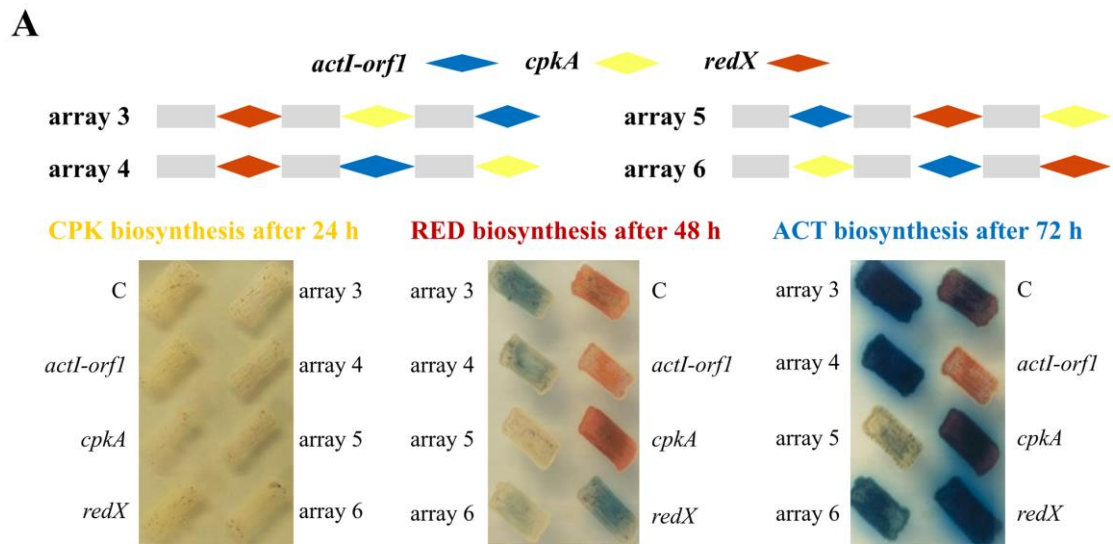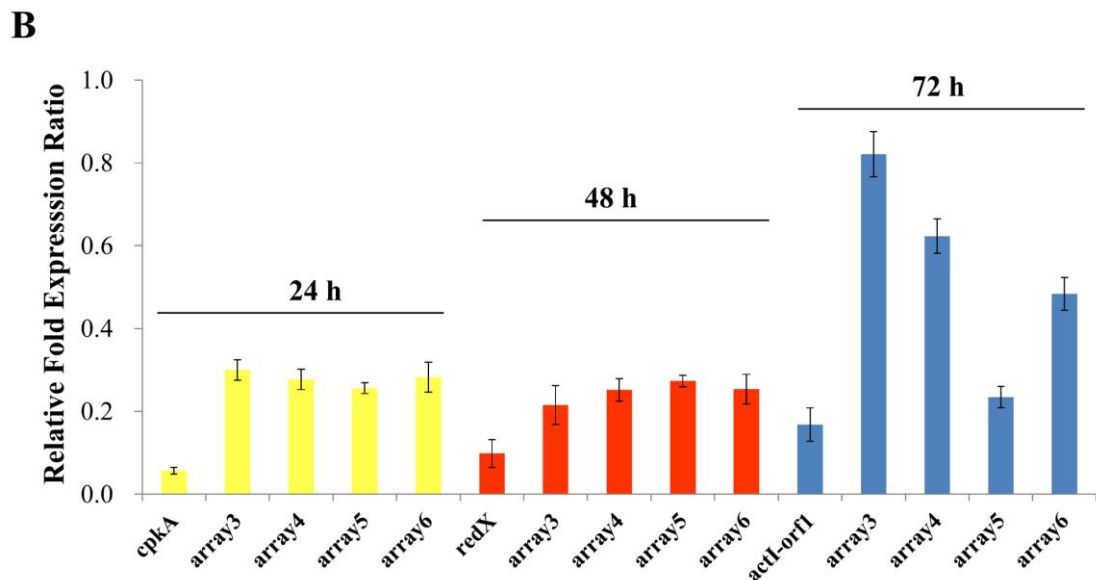

**Fig. S3. ddCpf1-mediated simultaneous repression of three genes using a single customized crRNA array in *S. coelicolor*.** (A) Phenotypic analysis of the exoconjugants with the individual editing plasmid containing single or multiple crRNAs. Three target genes (*cpkA*, *actI-orf1* and *redX*) were selected for simultaneous repression. The order of crRNAs targeting three genes is designed as array 3, array 4, array 5 or array 6. The strain only expressing ddCpf1 was used as the control (indicated as C). Images for antibiotics production (CPK, RED and ACT) was photographed at the time indicated. (B) Transcriptional analysis of *cpkA*, *redX* and

*actI-orf1* in the strains with the individual editing plasmid containing single or multiple crRNAs. RNA samples for the analysis of *cpkA*, *redX* and *actI-orf1* transcription were isolated from the cultures after growth for 24, 48 and 72 h, respectively. The transcriptional levels of each gene were analyzed in the engineered strains expressing ddCpf1 with individual crRNA or crRNA arrays, and the strain only expressing ddCpf1 was used as the control (indicated as C).

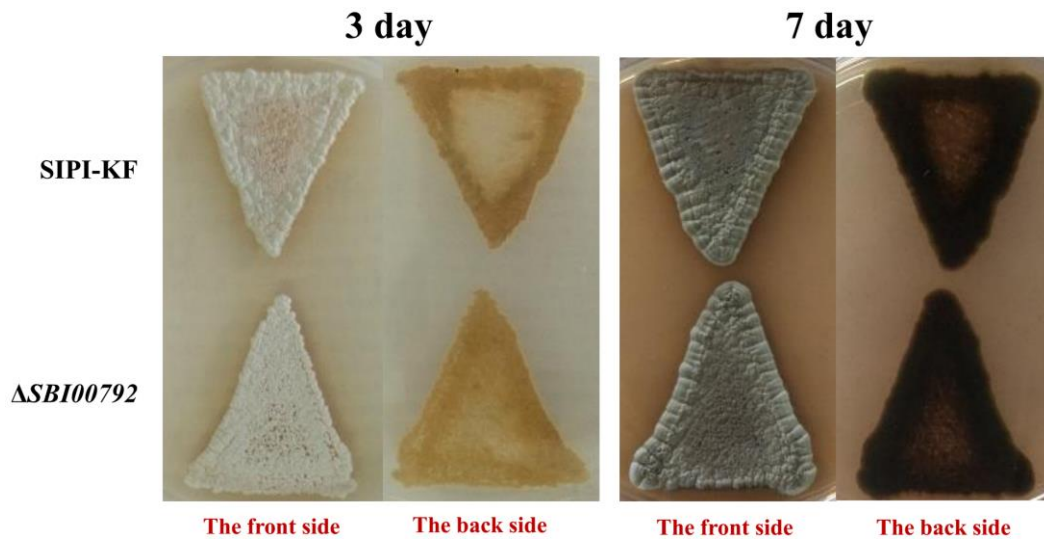

**Fig. S4. Effect of deletion of *SBI00792* on bacterial growth.** The parental strain *S. hygrosopicus* SIPI-KF and the  $\Delta$ *SBI00792* mutant were grown on MB plates and images were photographed from the front and back sides at 3 and 7 days.

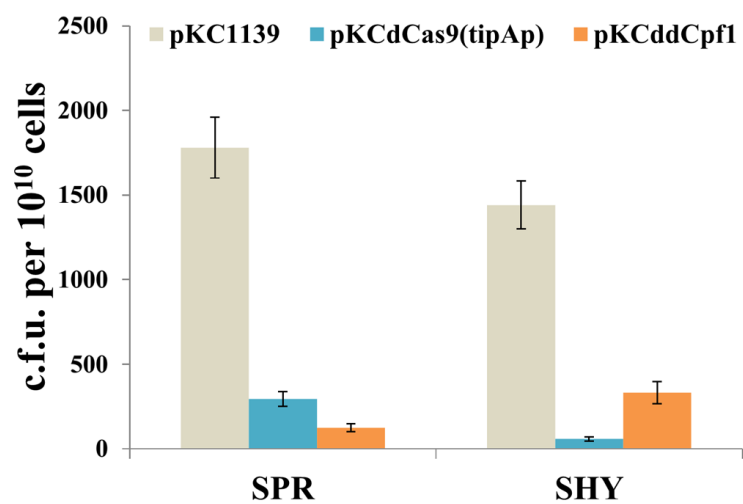

**Fig. S5. Growth of the two important industrial *Streptomyces* species only expressing dCas9 or ddCpf1.** pKC1139 was used as the control. c. f. u. represents colony-forming unit. SPR: *S. pristinaespiralis* HCCB10218, SHY: *S. hygroscopicus* SIPI-KF.

**Table S1** PAM occurrence frequencies of four different class 2 CRISPR-Cas systems in *Streptomyces coelicolor* M145

|                                         | <i>SpCas9</i> | <i>FnCpf1</i> | <i>AsCpf1/LbCpf1</i> |
|-----------------------------------------|---------------|---------------|----------------------|
| <b>PAM sequence</b>                     | NGG           | TTV           | TTTV                 |
| <b>Occurrence frequency</b>             | 0.26          | 0.0334        | 0.0047               |
| <b>PAM numbers in 100-bp DNA region</b> | 26            | 3.34          | 0.47                 |
| <b>PAM numbers in single gene</b>       | 257.7         | 33.1          | 4.7                  |

**Table S2** Bacterial plasmids and strains used in this study

| Plasmids or Strains                       | Relevant features                                                                                                                                           | Source/Reference    |
|-------------------------------------------|-------------------------------------------------------------------------------------------------------------------------------------------------------------|---------------------|
| <b>Plasmids</b>                           |                                                                                                                                                             |                     |
| pCB003                                    | pMB1ori, <i>aadA</i> , the promoter j23119 was used to express the synthetic guide RNA(sgRNA)                                                               | Huang et al., 2015  |
| pKC1139                                   | A replicative vector in actinomycetes harboring a temperature sensitive replicon pSG5, <i>oriT</i> , and <i>aac(3)IV</i>                                    | Kieser et al., 2000 |
| pAH91 <i>kasOp</i> *- <i>cmlR</i>         | pAH91 with <i>cmlR</i> under the control of the strong promoter <i>kasOp</i> *                                                                              | Li et al., 2017     |
| pIB139                                    | An integrative plasmid containing <i>oriT</i> , <i>attP</i> , <i>int</i> , <i>aac(3)IV</i> and <i>ermEp</i> *                                               | Kieser et al., 2000 |
| pIB-00792                                 | pIB139 with <i>SBI00792</i> under the control of the strong promoter <i>ermEp</i> *                                                                         | This study          |
| pKCCas9( <i>tipAp</i> )                   | pKC1139 with the <i>scocas9</i> gene under the control of the inducible promoter <i>tipAp</i>                                                               | Huang et al., 2015  |
| pKCCas9( <i>tipAp</i> )- <i>actI-orfI</i> | pKCCas9( <i>tipAp</i> ) with the sgRNA transcription cassette for editing <i>actI-orfI</i>                                                                  | This study          |
| pKCCdCas9( <i>tipAp</i> )                 | pKC1139 with the <i>scocas9</i> (D10A and H840A) gene under the control of the inducible promoter <i>tipAp</i>                                              | This study          |
| pKCCpf1( <i>tipAp</i> )                   | pKC1139 with the <i>scocpf1</i> gene under the control of the inducible promoter <i>tipAp</i> and the crRNA repeat unit under the control of <i>kasOp</i> * | This study          |
| pKCCpf1( <i>tipAp</i> )- <i>actI-orfI</i> | pKCCpf1( <i>tipAp</i> ) with the crRNA transcription cassette for editing <i>actI-orfI</i>                                                                  | This study          |
| pKCCpf1                                   | pKC1139 with the <i>scocpf1</i> gene under the control of <i>ermEp</i> * and the crRNA repeat unit under the control of the strong promoter <i>kasOp</i> *  | This study          |
| pKCCddCpf1                                | pKC1139 with the <i>scocpf1</i> (E1006A) gene under the control of the promoter <i>ermEp</i> *                                                              | This study          |
| pKCCpf1- <i>actI-orfI</i>                 | pKCCpf1 with the crRNA transcription cassette for editing <i>actI-orfI</i>                                                                                  | This study          |
| pKCCpf1- <i>actI-orfI</i> -up (TTC)       | pKCCpf1 with the crRNA transcription cassette for editing the upstream of <i>actI-orfI</i> and PAM is TTC                                                   | This study          |
| pKCCpf1- <i>actI-orfI</i> -up (CTG)       | pKCCpf1 with the crRNA transcription cassette for editing the upstream of <i>actI-orfI</i> and PAM is CTG                                                   | This study          |
| pKCCpf1- <i>actI-orfI</i> -down (TTG)     | pKCCpf1 with the crRNA transcription cassette for editing the downstream of <i>actI-orfI</i> and PAM is TTG                                                 | This study          |
| pKCCpf1- <i>actI-orfI</i> -down (CTC)     | pKCCpf1 with the crRNA transcription cassette for editing the downstream of <i>actI-orfI</i> and PAM is CTC                                                 | This study          |
| pKCCpf1- <i>actVB</i> (TTC)               | pKCCpf1 with the crRNA transcription cassette for editing <i>actVB</i> and PAM is TTC                                                                       | This study          |
| pKCCpf1- <i>actVB</i> (CTG)               | pKCCpf1 with the crRNA transcription cassette for editing <i>actVB</i> and PAM is CTG                                                                       | This study          |



---

|                                            |                                                                                                                                      |            |
|--------------------------------------------|--------------------------------------------------------------------------------------------------------------------------------------|------------|
| pKCCpf1- <i>actI-orf1</i> -up<br>(23 nt)   | pKCCpf1 with the crRNA transcription cassette for editing the upstream of <i>actI-orf1</i> and the spacer length of crRNA is 23 nt   | This study |
| pKCCpf1- <i>actI-orf1</i> -up<br>(22 nt)   | pKCCpf1 with the crRNA transcription cassette for editing the upstream of <i>actI-orf1</i> and the spacer length of crRNA is 22 nt   | This study |
| pKCCpf1- <i>actI-orf1</i> -up<br>(21 nt)   | pKCCpf1 with the crRNA transcription cassette for editing the upstream of <i>actI-orf1</i> and the spacer length of crRNA is 21 nt   | This study |
| pKCCpf1- <i>actI-orf1</i> -up<br>(20 nt)   | pKCCpf1 with the crRNA transcription cassette for editing the upstream of <i>actI-orf1</i> and the spacer length of crRNA is 20 nt   | This study |
| pKCCpf1- <i>actI-orf1</i> -up<br>(19 nt)   | pKCCpf1 with the crRNA transcription cassette for editing the upstream of <i>actI-orf1</i> and the spacer length of crRNA is 19 nt   | This study |
| pKCCpf1- <i>actI-orf1</i> -up<br>(18 nt)   | pKCCpf1 with the crRNA transcription cassette for editing the upstream of <i>actI-orf1</i> and the spacer length of crRNA is 18 nt   | This study |
| pKCCpf1- <i>actI-orf1</i> -up<br>(17 nt)   | pKCCpf1 with the crRNA transcription cassette for editing the upstream of <i>actI-orf1</i> and the length of spacer is 17 nt         | This study |
| pKCCpf1- <i>actI-orf1</i> -up<br>(16 nt)   | pKCCpf1 with the crRNA transcription cassette for editing the upstream of <i>actI-orf1</i> and the spacer length of crRNA is 16 nt   | This study |
| pKCCpf1- <i>actI-orf1</i> -down<br>(23 nt) | pKCCpf1 with the crRNA transcription cassette for editing the downstream of <i>actI-orf1</i> and the spacer length of crRNA is 23 nt | This study |
| pKCCpf1- <i>actI-orf1</i> -down<br>(22 nt) | pKCCpf1 with the crRNA transcription cassette for editing the downstream of <i>actI-orf1</i> and the spacer length of crRNA is 22 nt | This study |
| pKCCpf1- <i>actI-orf1</i> -down<br>(21 nt) | pKCCpf1 with the crRNA transcription cassette for editing the downstream of <i>actI-orf1</i> and the spacer length of crRNA is 21 nt | This study |
| pKCCpf1- <i>actI-orf1</i> -down<br>(20 nt) | pKCCpf1 with the crRNA transcription cassette for editing the downstream of <i>actI-orf1</i> and the spacer length of crRNA is 20 nt | This study |
| pKCCpf1- <i>actI-orf1</i> -down<br>(19 nt) | pKCCpf1 with the crRNA transcription cassette for editing the downstream of <i>actI-orf1</i> and the spacer length of crRNA is 19 nt | This study |
| pKCCpf1- <i>actI-orf1</i> -down<br>(18 nt) | pKCCpf1 with the crRNA transcription cassette for editing the downstream of <i>actI-orf1</i> and the spacer length of crRNA is 18 nt | This study |
| pKCCpf1- <i>actI-orf1</i> -down<br>(17 nt) | pKCCpf1 with the crRNA transcription cassette for editing the downstream of <i>actI-orf1</i> and the spacer                          | This study |

---

---

|                                         |                                                                                                                                                                      |                    |
|-----------------------------------------|----------------------------------------------------------------------------------------------------------------------------------------------------------------------|--------------------|
|                                         | length of crRNA is 17 nt                                                                                                                                             |                    |
| pKCCpf1- <i>actI-orf1</i> -down (16 nt) | pKCCpf1 with the crRNA transcription cassette for editing the downstream of <i>actI-orf1</i> and the spacer length of crRNA is 16 nt                                 | This study         |
| pKCCpf1- <i>actI-orf1</i> -HR           | pKCCpf1 with the crRNA transcription cassette for deleting <i>actI-orf1</i> and two homologous arms                                                                  | This study         |
| pKCCpf1- <i>redX</i> -HR                | pKCCpf1 with the crRNA transcription cassette for deleting <i>redX</i> and two homologous arms                                                                       | This study         |
| pKCCpf1- <i>actI-orf1-redX</i> -HR      | pKCCpf1 with two-pair homologous arms and the crRNA transcription cassettes for simultaneously deleting <i>actI-orf1</i> and <i>redX</i>                             | This study         |
| pZX09                                   | NHEJ expression vector harboring the <i>ligD</i> and <i>ku</i> genes from <i>Mycobacterium smegmatis</i>                                                             | Zheng et al., 2017 |
| pGH- <i>gadphp</i> -Sda-LK              | NHEJ cloning vector harboring the <i>ligD</i> and <i>ku</i> genes from <i>Streptomyces daghestanicus</i> under the control of the ultrastrong promoter <i>gadphp</i> | This study         |
| pKCCpf1-MsmP                            | pKCCpf1 with the <i>ligD</i> and <i>Ku</i> genes from <i>Mycobacterium smegmatis</i> under the control of the ultrastrong promoter <i>gadphp</i>                     | This study         |
| pKCCpf1-MsmE                            | pKCCpf1 with the <i>ligD</i> and <i>Ku</i> genes from <i>Mycobacterium smegmatis</i> under the control of the strong promoter <i>ermEp</i> *                         | This study         |
| pKCCpf1-SdaP                            | pKCCpf1 with the <i>ligD</i> and <i>Ku</i> genes from <i>Streptomyces daghestanicus</i> under the control of the ultrastrong promoter <i>gadphp</i>                  | This study         |
| pKCCpf1-SdaE                            | pKCCpf1 with the <i>ligD</i> and <i>Ku</i> genes from <i>Streptomyces daghestanicus</i> under the control of the strong promoter <i>ermEp</i> *                      | This study         |
| pKCCpf1-PpuP                            | pKCCpf1 with the <i>ligD</i> and <i>Ku</i> genes from <i>Pseudomonas putida</i> KT2440 under the control of the ultrastrong promoter <i>gadphp</i>                   | This study         |
| pKCCpf1-PpuE                            | pKCCpf1 with the <i>ligD</i> and <i>Ku</i> genes from <i>Pseudomonas putida</i> KT2440 under the control of the strong promoter <i>ermEp</i> *                       | This study         |
| pKCCpf1-MsmE- <i>redX</i>               | pKCCpf1-MsmE with the crRNA transcription cassette for editing <i>redX</i>                                                                                           | This study         |
| pKCCpf1-SdaE- <i>redX</i>               | pKCCpf1-SdaE with the crRNA transcription cassette for editing <i>redX</i>                                                                                           | This study         |
| pKCCpf1-PpuE- <i>redX</i>               | pKCCpf1-PpuE with the crRNA transcription cassette for editing <i>redX</i>                                                                                           | This study         |
| pKCCpf1-MsmE- <i>actI-orf1</i>          | pKCCpf1-MsmE with the crRNA transcription cassette for editing <i>actI-orf1</i>                                                                                      | This study         |
| pKCCpf1-SdaE- <i>actI-orf1</i>          | pKCCpf1-SdaE with the crRNA transcription cassette for editing <i>actI-orf1</i>                                                                                      | This study         |

---

|                                                                   |                                                                                                                                                                                   |                      |
|-------------------------------------------------------------------|-----------------------------------------------------------------------------------------------------------------------------------------------------------------------------------|----------------------|
| pKCCpf1-PpuE- <i>actI-orf1</i>                                    | pKCCpf1-PpuE with the crRNA transcription cassette for editing <i>actI-orf1</i>                                                                                                   | This study           |
| pKCCpf1-MsmE-RED-BGC                                              | pKCCpf1-MsmE with the artificial CRISPR array for transcribing two crRNAs for deleting RED biosynthetic gene cluster                                                              | This study           |
| pSET152                                                           | pUC19 <i>ori</i> , $\Phi$ C31 <i>int/attP</i> , <i>aac(3)IV</i> , <i>lacZ<math>\alpha</math></i> , and <i>oriT</i> RK2                                                            | Bierman et al., 1992 |
| pSETddCpf1                                                        | pSET152 with <i>Scocpf1</i> (E1006A) gene under the control of the strong promoter <i>ermEp*</i> and the crRNA repeat unit under the control of the strong promoter <i>kasOp*</i> | This study           |
| pSETddCpf1- <i>redX</i> -T1<br>(also as pSETddCpf1- <i>redX</i> ) | pSETddCpf1 with the crRNA transcription cassette targeting the template strand of <i>redX</i> , No.1                                                                              | This study           |
| pSETddCpf1- <i>redX</i> -T2                                       | pSETddCpf1 with the crRNA transcription cassette targeting the template strand of <i>redX</i> , No.2                                                                              | This study           |
| pSETddCpf1- <i>redX</i> -T3                                       | pSETddCpf1 with the crRNA transcription cassette targeting the template strand of <i>redX</i> , No.3                                                                              | This study           |
| pSETddCpf1- <i>redX</i> -T4                                       | pSETddCpf1 with the crRNA transcription cassette targeting the template strand of <i>redX</i> , No.4                                                                              | This study           |
| pSETddCpf1- <i>redX</i> -NT1                                      | pSETddCpf1 with the crRNA transcription cassette targeting the non-template strand of <i>redX</i> , No.1                                                                          | This study           |
| pSETddCpf1- <i>redX</i> -NT2                                      | pSETddCpf1 with the crRNA transcription cassette targeting the non-template strand of <i>redX</i> , No.2                                                                          | This study           |
| pSETddCpf1- <i>redX</i> -NT3                                      | pSETddCpf1 with the crRNA transcription cassette targeting the non-template strand of <i>redX</i> , No.3                                                                          | This study           |
| pSETddCpf1- <i>redX</i> -NT4                                      | pSETddCpf1 with the crRNA transcription cassette targeting the non-template strand of <i>redX</i> , No.4                                                                          | This study           |
| pSETddCpf1- <i>actI-orf1</i>                                      | pSETddCpf1 with the crRNA transcription cassette targeting the template strand of <i>actI-orf1</i>                                                                                | This study           |
| pSETddCpf1- <i>cpkA</i>                                           | pSETddCpf1 with the crRNA transcription cassette targeting the template strand of <i>cpkA</i>                                                                                     | This study           |
| pSETddCpf1- <i>array 1</i>                                        | pSETddCpf1 with the artificial CRISPR array for transcribing three crRNAs targeting the template strands of <i>redX</i> , <i>cpkA</i> and <i>actI-orf1</i>                        | This study           |
| pSETddCpf1- <i>array 2</i>                                        | pSETddCpf1 with the artificial CRISPR array for transcribing three crRNAs targeting the template strands of <i>actI-orf1</i> , <i>redX</i> and <i>cpkA</i>                        | This study           |
| pSETddCpf1- <i>array 3</i>                                        | pSETddCpf1 with the artificial CRISPR array for transcribing three crRNAs targeting the template strands of <i>actI-orf1</i> , <i>cpkA</i> and <i>redX</i>                        | This study           |
| pSETddCpf1- <i>array 4</i>                                        | pSETddCpf1 with the artificial CRISPR array for transcribing three crRNAs targeting the template strands of <i>cpkA</i> , <i>actI-orf1</i> and <i>redX</i>                        | This study           |
| pSETddCpf1- <i>array 5</i>                                        | pSETddCpf1 with the artificial CRISPR array for                                                                                                                                   | This study           |

|                                       |                                                                                                                                                                                                                                    |                     |
|---------------------------------------|------------------------------------------------------------------------------------------------------------------------------------------------------------------------------------------------------------------------------------|---------------------|
|                                       | transcribing three crRNAs targeting the template strands of <i>cpkA</i> , <i>redX</i> and <i>actI-orf1</i>                                                                                                                         |                     |
| pSETddCpf1-array 6                    | pSETddCpf1 with the artificial CRISPR array for transcribing three crRNAs targeting the template strands of <i>redX</i> , <i>actI-orf1</i> and <i>cpkA</i>                                                                         | This study          |
| pKCCpf1-SBI00792                      | pKCCpf1 with the crRNA transcription cassette for editing <i>SBI00792</i>                                                                                                                                                          | This study          |
| pKCCpf1-SBI00792-HR1.0                | pKCCpf1 with the crRNA transcription cassette for deleting <i>SBI00792</i> and two 1-kb homologous arms                                                                                                                            | This study          |
| pKCCpf1-SBI00792-HR1.5                | pKCCpf1 with the crRNA transcription cassette for deleting <i>SBI00792</i> and two 1.5-kb homologous arms                                                                                                                          | This study          |
| pKCCpf1-SBI00792-HR2.0                | pKCCpf1 with the crRNA transcription cassette for deleting <i>SBI00792</i> and two 2-kb homologous arms                                                                                                                            | This study          |
| pKCCpf1-SBI00792-HR2.5                | pKCCpf1 with the crRNA transcription cassette for deleting <i>SBI00792</i> and two 2.5-kb homologous arms                                                                                                                          | This study          |
| <b><i>Escherichia coli</i></b>        |                                                                                                                                                                                                                                    |                     |
| DH5 $\alpha$                          | F <sup>-</sup> 80 $\Phi$ <i>dlacZDM15</i> $\Delta$ ( <i>lacZYA-argF</i> ) <i>U169deoR recA1 endA1 hsdR17</i> (rk <sup>-</sup> mk <sup>+</sup> ) <i>supE44</i> $\lambda$ <sup>-</sup> <i>thi</i> <sup>-</sup> 1 <i>gyrA96 relA1</i> | GIBCO-BRL           |
| ET12567/pUZ8002                       | ET12567 containing the non-transmissible RP4 derivative plasmid pUZ8002                                                                                                                                                            | GIBCO-BRL           |
| S17-1                                 | <i>supE44</i> , $\Delta$ <i>lacU169</i> ( $\Phi$ <i>lacZ</i> $\Delta$ M15), <i>recA1</i> , <i>endA1</i> , <i>hsdR17</i> , <i>thi-1</i> , <i>gyrA96</i> , <i>relA1</i> , <i>par</i> phage lysogenic                                 | GIBCO-BRL           |
| <b><i>Streptomyces coelicolor</i></b> |                                                                                                                                                                                                                                    |                     |
| M145                                  | SCP1- SCP2-, a derivative from <i>S. coelicolor</i> A3(2) [wild type]                                                                                                                                                              | Kieser et al., 2000 |
| M145/pKC1139                          | M145 carrying the plasmid pKC1139                                                                                                                                                                                                  | This study          |
| M145/pKCCas9( <i>tipAp</i> )          | M145 carrying the plasmid pKCCas9( <i>tipAp</i> )                                                                                                                                                                                  | This study          |
| M145/pKCCpf1( <i>tipAp</i> )          | M145 carrying the plasmid pKCCpf1( <i>tipAp</i> )                                                                                                                                                                                  | This study          |
| M145/pKCCpf1                          | M145 carrying the plasmid pKCCpf1                                                                                                                                                                                                  | This study          |
| $\Delta$ <i>actI-orf1</i>             | Mutant with in-frame deletion of the <i>actI-orf1</i> gene                                                                                                                                                                         | This study          |
| $\Delta$ <i>redX</i>                  | Mutant with in-frame deletion of the <i>redX</i> gene                                                                                                                                                                              | This study          |
| $\Delta$ <i>actI-orf1-redX</i>        | Mutant with in-frame deletion of both <i>actI-orf1</i> and <i>redX</i>                                                                                                                                                             | This study          |
| M145/pKCCpf1-MsmP                     | M145 carrying the plasmid pKCCpf1-MsmP                                                                                                                                                                                             | This study          |
| M145/pKCCpf1-MsmE                     | M145 carrying the plasmid pKCCpf1-MsmE                                                                                                                                                                                             | This study          |
| M145/pKCCpf1-SdaP                     | M145 carrying the plasmid pKCCpf1-SdaP                                                                                                                                                                                             | This study          |
| M145/pKCCpf1-SdaE                     | M145 carrying the plasmid pKCCpf1-SdaE                                                                                                                                                                                             | This study          |
| M145/pKCCpf1-PpuP                     | M145 carrying the plasmid pKCCpf1-PpuP                                                                                                                                                                                             | This study          |
| M145/pKCCpf1-PpuE                     | M145 carrying the plasmid pKCCpf1-PpuE                                                                                                                                                                                             | This study          |
| M145/pSETddCpf1                       | M145 carrying the plasmid pSETddCpf1                                                                                                                                                                                               | This study          |
| M145/pSETddCpf1- <i>redX</i> -T1      | M145 carrying the plasmid pSETddCpf1- <i>redX</i> -T1                                                                                                                                                                              | This study          |
| M145/pSETddCpf1- <i>redX</i> -T2      | M145 carrying the plasmid pSETddCpf1- <i>redX</i> -T2                                                                                                                                                                              | This study          |
| M145/pSETddCpf1- <i>redX</i> -T3      | M145 carrying the plasmid pSETddCpf1- <i>redX</i> -T3                                                                                                                                                                              | This study          |
| M145/pSETddCpf1- <i>redX</i> -T4      | M145 carrying the plasmid pSETddCpf1- <i>redX</i> -T4                                                                                                                                                                              | This study          |

|                                          |                                                                                                                                                             |                        |
|------------------------------------------|-------------------------------------------------------------------------------------------------------------------------------------------------------------|------------------------|
| M145/pSETddCpf1- <i>redX</i> -NT1        | M145 carrying the plasmid pSETddCpf1- <i>redX</i> -NT1                                                                                                      | This study             |
| M145/pSETddCpf1- <i>redX</i> -NT2        | M145 carrying the plasmid pSETddCpf1- <i>redX</i> -NT2                                                                                                      | This study             |
| M145/pSETddCpf1- <i>redX</i> -NT3        | M145 carrying the plasmid pSETddCpf1- <i>redX</i> -NT3                                                                                                      | This study             |
| M145/pSETddCpf1- <i>redX</i> -NT4        | M145 carrying the plasmid pSETddCpf1- <i>redX</i> -NT4                                                                                                      | This study             |
| M145/pSETddCpf1- <i>array</i> 1          | M145 carrying the plasmid pSETddCpf1- <i>array</i> 1                                                                                                        | This study             |
| M145/pSETddCpf1- <i>array</i> 2          | M145 carrying the plasmid pSETddCpf1- <i>array</i> 2                                                                                                        | This study             |
| M145/pSETddCpf1- <i>array</i> 3          | M145 carrying the plasmid pSETddCpf1- <i>array</i> 3                                                                                                        | This study             |
| M145/pSETddCpf1- <i>array</i> 4          | M145 carrying the plasmid pSETddCpf1- <i>array</i> 4                                                                                                        | This study             |
| M145/pSETddCpf1- <i>array</i> 5          | M145 carrying the plasmid pSETddCpf1- <i>array</i> 5                                                                                                        | This study             |
| M145/pSETddCpf1- <i>array</i> 6          | M145 carrying the plasmid pSETddCpf1- <i>array</i> 6                                                                                                        | This study             |
| <b>Other <i>Streptomyces</i> species</b> |                                                                                                                                                             |                        |
| <i>S. albus</i> J1074                    | Model <i>Streptomyces</i> , <i>S. albus</i> G mutant                                                                                                        | Chater and Wilde, 1976 |
| <i>S. venezuelae</i> ATCC10712           | Model <i>Streptomyces</i> [Wild type]                                                                                                                       | Bush et al., 2013      |
| <i>S. avermitilis</i> NRRL8165           | Avermectin-producing industrial strain                                                                                                                      | Ōmura et al., 2001     |
| <i>S. pristinaespiralis</i> HCCB10218    | Pristinamycin-producing industrial strain                                                                                                                   | Li et al., 2015        |
| <i>S. roseosporus</i> SIPI-DT51          | Daptomycin-producing industrial strain                                                                                                                      | SIPI                   |
| <i>S. hygroscopicus</i> SIPI-KF          | 5-oxomilbemycin A3/A4-producing industrial strain, derived from milbemycin-producing <i>S. hygroscopicus</i> strain (with deletion of the <i>milF</i> gene) | SIPI                   |
| <i>S. verticillus</i> SIPI-BL            | Bleomycin-producing industrial strain                                                                                                                       | SIPI                   |
| J1074/pKC1139                            | <i>S. albus</i> J1074 carrying the plasmid pKC1139                                                                                                          | This study             |
| J1074/pKCCas9( <i>tipAp</i> )            | <i>S. albus</i> J1074 carrying the plasmid pKCCas9( <i>tipAp</i> )                                                                                          | This study             |
| J1074/pKCCpf1                            | <i>S. albus</i> J1074 carrying the plasmid pKCCpf1                                                                                                          | This study             |
| 10712/pKC1139                            | <i>S. venezuelae</i> ATCC10712 carrying the plasmid pKC1139                                                                                                 | This study             |
| 10712/pKCCas9( <i>tipAp</i> )            | <i>S. venezuelae</i> ATCC10712 carrying the plasmid pKCCas9( <i>tipAp</i> )                                                                                 | This study             |
| 10712/pKCCpf1                            | <i>S. venezuelae</i> ATCC10712 carrying the plasmid pKCCpf1                                                                                                 | This study             |
| 8165/pKC1139                             | <i>S. avermitilis</i> NRRL8165 carrying the plasmid pKC1139                                                                                                 | This study             |
| 8165/pKCCas9( <i>tipAp</i> )             | <i>S. avermitilis</i> NRRL8165 carrying the plasmid pKCCas9( <i>tipAp</i> )                                                                                 | This study             |
| 8165/pKCCpf1                             | <i>S. avermitilis</i> NRRL8165 carrying the plasmid pKCCpf1                                                                                                 | This study             |
| 10218/pKC1139                            | <i>S. pristinaespiralis</i> 10218 carrying the plasmid pKC1139                                                                                              | This study             |
| 10218/pKCCas9( <i>tipAp</i> )            | <i>S. pristinaespiralis</i> 10218 carrying the plasmid                                                                                                      | This study             |

|                                   |                                                                                             |            |
|-----------------------------------|---------------------------------------------------------------------------------------------|------------|
| 10218/pKCCpf1                     | pKCCas9( <i>tipAp</i> )<br><i>S. pristinaespiralis</i> 10218 carrying the plasmid pKCCpf1   | This study |
| 10218/pKCdCas9( <i>tipAp</i> )    | <i>S. pristinaespiralis</i> 10218 carrying the plasmid pKCdCas9( <i>tipAp</i> )             | This study |
| 10218/pKCddCpf1                   | <i>S. pristinaespiralis</i> 10218 carrying the plasmid pKCddCpf1                            | This study |
| SIPI-DT51/pKC1139                 | <i>S. roseosporus</i> SIPI-DT51 carrying the plasmid pKC1139                                | This study |
| SIPI-DT51/pKCCas9( <i>tipAp</i> ) | <i>S. roseosporus</i> SIPI-DT51 carrying the plasmid pKCCas9( <i>tipAp</i> )                | This study |
| SIPI-DT51/pKCCpf1                 | <i>S. roseosporus</i> SIPI-DT51 carrying the plasmid pKCCpf1                                | This study |
| SIPI-KF/pKC1139                   | <i>S. hygrosopicus</i> SIPI-KF carrying the plasmid pKC1139                                 | This study |
| SIPI-KF/pKCCas9( <i>tipAp</i> )   | <i>S. hygrosopicus</i> SIPI-KF carrying the plasmid pKCCas9( <i>tipAp</i> )                 | This study |
| SIPI-KF/pKCCpf1                   | <i>S. hygrosopicus</i> SIPI-KF carrying the plasmid pKCCpf1                                 | This study |
| SIPI-KF/pKCdCas9( <i>tipAp</i> )  | <i>S. hygrosopicus</i> SIPI-KF carrying the plasmid pKCdCas9( <i>tipAp</i> )                | This study |
| SIPI-KF/pKCddCpf1                 | <i>S. hygrosopicus</i> SIPI-KF carrying the plasmid pKCddCpf1                               | This study |
| SIPI-BL/pKC1139                   | <i>S. verticillus</i> SIPI-BL carrying the plasmid pKC1139                                  | This study |
| SIPI-BL/pKCCas9( <i>tipAp</i> )   | <i>S. verticillus</i> SIPI-BL carrying the plasmid pKCCas9( <i>tipAp</i> )                  | This study |
| SIPI-BL/pKCCpf1                   | <i>S. verticillus</i> SIPI-BL carrying the plasmid pKCCpf1                                  | This study |
| $\Delta SBI00792$                 | Mutant with in-frame deletion of the <i>SBI00792</i> gene in <i>S. hygrosopicus</i> SIPI-KF | This study |
| SIPI-KF/pIB139                    | <i>S. hygrosopicus</i> SIPI-KF carrying the empty vector pIB139                             | This study |
| $\Delta SBI00792$ /pIB139         | <i>SBI00792</i> deletion mutant carrying the empty vector pIB139                            | This study |
| $\Delta SBI00792$ /pIB-00792      | <i>SBI00792</i> deletion mutant carrying the complemented plasmid pIB-00792                 | This study |

Note: SIPI represents Shanghai Institute of Pharmaceutical Industry.

**Table S3** The conditions of conjugal transfer for different *Streptomyces* species

| <i>Streptomyces</i> species           | Abbreviation | Donor <i>E. coli</i> | Medium                        |
|---------------------------------------|--------------|----------------------|-------------------------------|
| <i>S. coelicolor</i> M145             | SCO          | ET12567/pUZ8002      | M-Isp4+10 mM Mg <sup>2+</sup> |
| <i>S. albus</i> J1074                 | SAL          | ET12567/pUZ8002      | M-Isp4+10 mM Mg <sup>2+</sup> |
| <i>S. venezuelae</i> ATCC10712        | SVEN         | ET12567/pUZ8002      | M-Isp4+10 mM Mg <sup>2+</sup> |
| <i>S. avermitilis</i> NRRL8165        | SAV          | ET12567/pUZ8002      | M-Isp4+10 mM Mg <sup>2+</sup> |
| <i>S. roseosporus</i> SIPI-DT51       | SRO          | ET12567/pUZ8002      | M-Isp4+10 mM Mg <sup>2+</sup> |
| <i>S. pristinaespiralis</i> HCCB10218 | SPR          | S17-1                | M-Isp4+10 mM Mg <sup>2+</sup> |
| <i>S. hygrosopicus</i> SIPI-KF        | SHY          | S17-1                | M-Isp4+60 mM Mg <sup>2+</sup> |
| <i>S. verticillus</i> SIPI-BL         | SVER         | ET12567/pUZ8002      | M-Isp4+10 mM Mg <sup>2+</sup> |

**Table S4** Oligonucleotide sequences used in this study

| <b>Primers</b>                                                                                                                                                             | <b>Sequence (5'-3')</b>                             |
|----------------------------------------------------------------------------------------------------------------------------------------------------------------------------|-----------------------------------------------------|
| <b>Primers for the construction pKCCpf1(<i>tipAp</i>), pKCCpf1 and pKCddCpf1</b>                                                                                           |                                                     |
| <i>kasOp</i> *-crRNA-fw                                                                                                                                                    | gcTCTAGAtgttcacattcgaaccgtc                         |
| <i>kasOp</i> *-crRNA-rev                                                                                                                                                   | ggACTAGTatctacaacagtagaaattggccacgactttacaacac      |
| <i>ermEp</i> *-fw                                                                                                                                                          | aagcagagacggttcgaatgtgaacaGGATCCctctagtagcatgagtg   |
| <i>ermEp</i> *-rev                                                                                                                                                         | ttgttgacgaactcctggtagatggaCATATGtgatcctaccaaccggc   |
| ddcpf1-fw                                                                                                                                                                  | ggaattcCATATGtccatctaccaggagttcgtca                 |
| ddcpf1-rev                                                                                                                                                                 | gGAATTCcagttgttgcggttctgcacgaa                      |
| <b>Primers for the construction of pKCCas9(<i>tipAp</i>)-<i>actI-orf1</i>, pKCCpf1(<i>tipAp</i>)-<i>actI-orf1</i> and pKCCpf1-<i>actI-orf1</i></b>                         |                                                     |
| <i>cas9-actI-orf1</i> -fw                                                                                                                                                  | cccAAGCTTgcagatctcaaaaaagcaccgact                   |
| <i>cas9-actI-orf1</i> -rev                                                                                                                                                 | gACTAGTgaagcgcagagtcgcatcagtttagagctagaaatagca      |
| <i>cpf1-actI-orf1</i> -fw                                                                                                                                                  | gACTAGTatgacgactctgcgcttcaatccatctacaacagtagaaattgg |
| <i>cpf1-actI-orf1</i> -rev                                                                                                                                                 | ggaattcCATATGtgatcctaccaaccggcagcatt                |
| <b>Primers for the construction of the plasmids for determining PAM compatibility in <i>S. coelicolor</i></b>                                                              |                                                     |
| crRNA- <i>actI-orf1</i> -up-fw (TTC)                                                                                                                                       | gACTAGTatgacgactctgcgcttcaatccatctacaacagtagaaattgg |
| crRNA- <i>actI-orf1</i> -up-fw (CTG)                                                                                                                                       | gACTAGTacgactctgcgcttcaatccgaaatctacaacagtagaaattgg |
| crRNA- <i>actI-orf1</i> -down-fw (TTG)                                                                                                                                     | gACTAGTgacgcgacggacatcgactacatctacaacagtagaaattgg   |
| crRNA- <i>actI-orf1</i> -down-fw (CTC)                                                                                                                                     | gACTAGTagtggccgaccatcgacttgatctctacaacagtagaaattgg  |
| crRNA- <i>actVB</i> -fw (TTC)                                                                                                                                              | gACTAGTgtccatcgagacggacacgaacatctacaacagtagaaattgg  |
| crRNA- <i>actVB</i> -fw (CTG)                                                                                                                                              | gACTAGTttggccgtacgagccaggcagacatctacaacagtagaaattgg |
| crRNA-rev                                                                                                                                                                  | ggaattcCATATGtgatcctaccaaccggcagcatt                |
| <b>Primers for the construction of the plasmids for determining the efficient spacer lengths of crRNA in <i>S. coelicolor</i></b>                                          |                                                     |
| crRNA- <i>actI-orf1</i> -up-fw (23 nt)                                                                                                                                     | gACTAGTatgacgactctgcgcttcaatccatctacaacagtagaaattgg |
| crRNA- <i>actI-orf1</i> -up-fw (22 nt)                                                                                                                                     | gACTAGTtgacgactctgcgcttcaatccatctacaacagtagaaattgg  |
| crRNA- <i>actI-orf1</i> -up-fw (21 nt)                                                                                                                                     | gACTAGTgacgactctgcgcttcaatccatctacaacagtagaaattgg   |
| crRNA- <i>actI-orf1</i> -up-fw (20 nt)                                                                                                                                     | gACTAGTacgactctgcgcttcaatccatctacaacagtagaaattgg    |
| crRNA- <i>actI-orf1</i> -up-fw (19 nt)                                                                                                                                     | gACTAGTcgactctgcgcttcaatccatctacaacagtagaaattgg     |
| crRNA- <i>actI-orf1</i> -up-fw (18 nt)                                                                                                                                     | gACTAGTgactctgcgcttcaatccatctacaacagtagaaattgg      |
| crRNA- <i>actI-orf1</i> -up-fw (17 nt)                                                                                                                                     | gACTAGTactctgcgcttcaatccatctacaacagtagaaattgg       |
| crRNA- <i>actI-orf1</i> -up-fw (16 nt)                                                                                                                                     | gACTAGTctctgcgcttcaatccatctacaacagtagaaattgg        |
| crRNA- <i>actI-orf1</i> -down-fw (23 nt)                                                                                                                                   | gACTAGTgacgcgacggacatcgactacatctacaacagtagaaattgg   |
| crRNA- <i>actI-orf1</i> -down-fw (22 nt)                                                                                                                                   | gACTAGTacgcgacggacatcgactacatctacaacagtagaaattgg    |
| crRNA- <i>actI-orf1</i> -down-fw (21 nt)                                                                                                                                   | gACTAGTcgcgacggacatcgactacatctacaacagtagaaattgg     |
| crRNA- <i>actI-orf1</i> -down-fw (20 nt)                                                                                                                                   | gACTAGTgcgacggacatcgactacatctacaacagtagaaattgg      |
| crRNA- <i>actI-orf1</i> -down-fw (19 nt)                                                                                                                                   | gACTAGTcgcgacggacatcgactacatctacaacagtagaaattgg     |
| crRNA- <i>actI-orf1</i> -down-fw (18 nt)                                                                                                                                   | gACTAGTgacggacatcgactacatctacaacagtagaaattgg        |
| crRNA- <i>actI-orf1</i> -down-fw (17 nt)                                                                                                                                   | gACTAGTcgcgacggacatcgactacatctacaacagtagaaattgg     |
| crRNA- <i>actI-orf1</i> -down-fw (16 nt)                                                                                                                                   | gACTAGTggacatcgactacatctacaacagtagaaattgg           |
| crRNA-rev                                                                                                                                                                  | ggaattcCATATGtgatcctaccaaccggcagcatt                |
| <b>Primers for the construction and identification of <math>\Delta</math><i>actI-orf1</i>, <math>\Delta</math><i>redX</i> and <math>\Delta</math><i>actI-orf1-redX</i></b> |                                                     |



---

|                                                                                                          |                                                                    |
|----------------------------------------------------------------------------------------------------------|--------------------------------------------------------------------|
| Del-actI-orf1-up-fw                                                                                      | gACTAGTAcggtgagaaggtgctcgtgtagca                                   |
| Del-actI-orf1-up-rev                                                                                     | aacgtagtcgagatgcactcggggtcgtgaaggccgatacgggaccctcgat               |
| Del-actI-orf1-down-fw                                                                                    | agcgaccccgagtgcgatctcgacta                                         |
| Del-actI-orf1-down-rev                                                                                   | tgtagatggattgaagcgagagtcgtcattcggcgaacacgacgtcgactcct              |
| actI-orf1-crRNA-fw                                                                                       | atgacgactctgcgcttcaatccatctacaacagtagaaattgg                       |
| actI-orf1-crRNA-rev                                                                                      | ggaattcCATATGtgatcctaccaaccggcagcatt                               |
| ID-actI-orf1-fw                                                                                          | aggcgctggaatcgtatcggaaatct                                         |
| ID-actI-orf1-rev                                                                                         | acatcagggcgggtgaccacgtcga                                          |
| Del-redX-up-fw                                                                                           | gACTAGTactgcctcggcctggaccggcagta                                   |
| Del-redX-up-rev                                                                                          | cgtcgaagtcgaagttcatcgcgttgcgtcggcttctccaggagcacgtggcata            |
| Del-redX-down-fw                                                                                         | gacgcaacgcgatgaacttcgactt                                          |
| Del-redX-down-rev                                                                                        | tgtagatccacctgttgcgaggaaggcaactggacggcgtccagtcaggatt               |
| redX-crRNA-fw                                                                                            | tgcttctcctgatcaacaggtggatctacaacagtagaaattgg                       |
| redX-crRNA-rev                                                                                           | cccAAGCTTatctaccaaccggcagcattgtgc                                  |
| ID-redX-fw                                                                                               | acatcgaggtcgacgtggcagcgtt                                          |
| ID-redX-rev                                                                                              | gatctcgttgggtgccggagaagat                                          |
| <b>Primers for the construction of NHEJ expression vector and the identification of deletion mutants</b> |                                                                    |
| Msm-ligD-fw                                                                                              | cgGATATCcatggagcgtatgagcgggttcgctgacgaa                            |
| Msm-ligD-rev                                                                                             | gcTCTAGAgcctattcccacacaacctcatcgggtg                               |
| Msm-ku-fw                                                                                                | gcTCTAGAAaggagtgccatgatgaacctgcccgtacgccatactg                     |
| Msm-ku-rev                                                                                               | cccAAGCTTctacgacttcttcgcagctgccttctt                               |
| Ppu-ligD-fw                                                                                              | gACTAGTAgctttGTTTAAACatggccaagcccctgcaggaatac                      |
| Ppu-ligD-rev                                                                                             | catatggacactcctTCTAGAgctcattcagccctagctgcttgcgat                   |
| Ppu-ku-fw                                                                                                | gcTCTAGAAaggagtgccatgatgctcgggcaatctgaaaggcgcacatcag               |
| Ppu-ku-rev                                                                                               | cccAAGCTTtcatgaagccttgcgcttcttctac                                 |
| gapdhp-fw                                                                                                | gACTAGTgctgctccttcggcggacgtgcgtcta                                 |
| gapdhp-rev                                                                                               | agctttGTTTAAACgcgtatccccttcagatactcgca                             |
| ermEp*-fw (Spe I)                                                                                        | gACTAGTcatgcgagtgccgttcgagt                                        |
| ermEp*-rev (EcoR V)                                                                                      | cgGATATCcatatgtggatcctaccaac                                       |
| ermEp*-rev (Pme I)                                                                                       | agctttGTTTAAACcatatgtggatcctaccaac                                 |
| crRNA-RED-BGC-fw                                                                                         | gACTAGTcgggtgcacgtaggtcagctgtaatctacaacagtagaaatttgcttctcctgatcaac |
| crRNA-rev                                                                                                | aggtggatctacaacagtagaaattgg                                        |
| ID-NHEJ-redX-fw                                                                                          | ggaattcCATATGtgatcctaccaaccggcagcatt                               |
| ID-NHEJ-redX-rev                                                                                         | tcaactgaccggcaccgtatgccacgt                                        |
| ID-NHEJ-RED-BGC-fw                                                                                       | gatctcgttgggtgccggagaagat                                          |
| ID-NHEJ-RED-BGC-rev                                                                                      | tcaactgaccggcaccgtatgccacgt                                        |
| ID-NHEJ-RED-BGC-rev                                                                                      | gatctgtggaggggatctgtggat                                           |
| <b>Primers for the construction of a series of CRISPRi plasmids</b>                                      |                                                                    |
| ddcpf1-up-fw                                                                                             | aagcttgggctgcaggtcgcTCTAGAtcagttgttgcggttctgcacgaa                 |
| ddcpf1-up-E1006A-rev                                                                                     | atcgagtacaacgccatcgtcttccgccacctgaacttcggcttcaag                   |
| ddcpf1-down-fw                                                                                           | ggcgaagacgacgatggcgttgt                                            |
| ddcpf1-down-rev                                                                                          | ttgccgccggcgctttttattgttgaGTTTAAACtatgcttaattaatcaag               |
| CRISPRi-redX-T1-fw                                                                                       | gACTAGTctgtggctgtgctgttctgaatctacaacagtagaaattgg                   |
| CRISPRi-redX-T2-fw                                                                                       | gACTAGTtgcgcggccgacagcagtagcgtatctacaacagtagaaattgg                |

---

---

|                               |                                                                                                                                     |
|-------------------------------|-------------------------------------------------------------------------------------------------------------------------------------|
| CRISPRi- <i>redX</i> -T3-fw   | gACTAGTcggtgtagaggcccggcgaaatctacaacagtagaaatttgg                                                                                   |
| CRISPRi- <i>redX</i> -T4-fw   | gACTAGTgccttcctcgatcaacaggtggatctacaacagtagaaatttgg                                                                                 |
| CRISPRi- <i>redX</i> -NT1-fw  | gACTAGTcacggacacaccaccgctcagatctacaacagtagaaatttgg                                                                                  |
| CRISPRi- <i>redX</i> -NT2-fw  | gACTAGTctggctctcgcgcagccgtggaatctacaacagtagaaatttgg                                                                                 |
| CRISPRi- <i>redX</i> -NT3-fw  | gACTAGTtcggaaccgctcgtcggcagatctacaacagtagaaatttgg                                                                                   |
| CRISPRi- <i>redX</i> -NT4-fw  | gACTAGTcaattaccacctgtgatcagatctacaacagtagaaatttgg                                                                                   |
| CRISPRi- <i>actI-orf1</i> -fw | gACTAGTatgacgactctgcgcttcaatccatctacaacagtagaaatttgg                                                                                |
| CRISPRi- <i>cpkA</i> -fw      | gACTAGTgaaccgctgtgcagcagctcccaatctacaacagtagaaatttgg                                                                                |
| CRISPRi-array 1-fw            | gACTAGTctgtggctgtcgttctgaatctacaacagtagaaattgaaccgctgtgcagcagctcccaatctacaacagtagaaattatgacgactctgcgcttcaatccatctacaacagtagaaatttgg |
| CRISPRi-array 2-fw            | gACTAGTatgacgactctgcgcttcaatccatctacaacagtagaaattctgtggctgtcgttctgaatctacaacagtagaaattgaaccgctgtgcagcagctcccaatctacaacagtagaaatttgg |
| CRISPRi-array 3-fw            | gACTAGTatgacgactctgcgcttcaatccatctacaacagtagaaattgaaccgctgtgcagcagctcccaatctacaacagtagaaattctgtggctgtcgttctgaatctacaacagtagaaatttgg |
| CRISPRi-array 4-fw            | gACTAGTgaaccgctgtgcagcagctcccaatctacaacagtagaaattatgacgactctgcgcttcaatccatctacaacagtagaaattctgtggctgtcgttctgaatctacaacagtagaaatttgg |
| CRISPRi-array 5-fw            | gACTAGTgaaccgctgtgcagcagctcccaatctacaacagtagaaattctgtggctgtcgttctgaatctacaacagtagaaattatgacgactctgcgcttcaatccatctacaacagtagaaatttgg |
| CRISPRi-array 6-fw            | gACTAGTctgtggctgtcgttctgaatctacaacagtagaaattatgacgactctgcgcttcaatccatctacaacagtagaaattgaaccgctgtgcagcagctcccaatctacaacagtagaaatttgg |

**Primers used in qRT-PCR analysis in *S. coelicolor***

|                           |                         |
|---------------------------|-------------------------|
| RT- <i>hrdB</i> -fw       | agcctcaaccagatcctcga    |
| RT- <i>hrdB</i> -rev      | agcggtcgccttctctgtgtgca |
| RT- <i>actI-orf1</i> -fw  | agttctgggaactgctcacct   |
| RT- <i>actI-orf1</i> -rev | acaggccacggcgaactgcga   |
| RT- <i>redX</i> -fw       | accatcgccatcgtcgggatgt  |
| RT- <i>redX</i> -rev      | accgtgccacgtcgacctgat   |
| RT- <i>cpkA</i> -fw       | agcagcggctcgtgctcgaact  |
| RT- <i>cpkA</i> -rev      | accgcctcgtccccgtactggta |

**Primers for the construction and identification of  $\Delta$ SBI00792**

|                                       |                                                                      |
|---------------------------------------|----------------------------------------------------------------------|
| <i>SBI00792</i> -crRNA-fw             | gtggccaaatttctactgtttagatcgcaacaaggacgagctccttggcACTAGTgcgtcgatgctcg |
| <i>SBI00792</i> -crRNA-rev            | cgttgtaaacgacggccagtgccaagcttCCATGGTgcgagtttaactatgctt               |
| Del- <i>SBI00792</i> -up-1kb-fw       | caacaaggacgagctccttggcACTAGTctctcgggctcgtagaagtgc                    |
| Del- <i>SBI00792</i> -down-1kb-rev    | gttgtaaacgacggccagtgccAAGCTTatcgtgttccgcaatcagc                      |
| Del- <i>SBI00792</i> -up-1.5 kb-fw    | caacaaggacgagctccttggcACTAGTggcagcatggcgttcttgg                      |
| Del- <i>SBI00792</i> -down-1.5 kb-rev | gttgtaaacgacggccagtgccAAGCTTtcgaggtacttggcgaacgag                    |
| Del- <i>SBI00792</i> -up-2 kb-fw      | caacaaggacgagctccttggcACTAGTaaagccctcggggacgggtgt                    |
| Del- <i>SBI00792</i> -down-2 kb-rev   | gttgtaaacgacggccagtgccAAGCTTcgccacctgcattcgtc                        |
| Del- <i>SBI00792</i> -up-2.5 kb-fw    | caacaaggacgagctccttggcACTAGTggcgacggtgtagtagtgcg                     |
| Del- <i>SBI00792</i> -down-2.5 kb-rev | gttgtaaacgacggccagtgccAAGCTTcctccacgatacggctcacct                    |
| Del- <i>SBI00792</i> -up-rev          | ggcttgggtgtagccgttctcg                                               |
| Del- <i>SBI00792</i> -down-fw         | agtttcgccgagaacggctacaccaaagccgtgctcaacgggctccaa                     |
| ID- <i>SBI00792</i> -fw               | tgaggctggcggagaagtgc                                                 |

---

---

|                           |                                    |
|---------------------------|------------------------------------|
| ID- <i>SBI00792</i> -rev  | gcatc <u>acgctgg</u> tttcct        |
| Com- <i>SBI00792</i> -fw  | ggaattcCATATGgtgagccagggaaaggegcgt |
| Com- <i>SBI00792</i> -rev | gGAATTCtggagcggctggagaacc          |

---

Note: The underlined letters stand for the restriction enzyme sites. The red, blue or yellow lowercase letters represent the guide sequences of crRNAs.

**Data1:**

**Sequence of synthetic codon-optimized *Fncpf1***

**>*scocpf1*, 3903 bp**

atgtccatctaccaggagttcgtcaacaagtacagcctgagcaagaccctccgcttcgagctgatccccagggaagaccctcgagaac  
atcaaggcccgcggcctgatcctggacgacgagaagcgggccaaggactacaagaaggccaagcagatcatcgacaagtaccaccagt  
tcttcacgaggagatcctgtcctccgtctgcatctccgaggacctgctgcagaactactccgacgtctacttcaagctgaagaagtccgacg  
acgacaacctgcagaaggacttcaagtcgccaaggacacatcaagaagcagatctccgagtacatcaaggactccgagaagtcaag  
aacctgttcaaccagaacctgatcgacccaagaaggccagagtcgacctgatcctgtggctgaagcagccaaggacaacggcat  
cgagctgttcaaggccaactccgacatcaccgacatcgacgagccctggagatcatcaagtccttcaagggtggaccacctacttcaag  
ggcttcacgagaaccgcaagaacgtctactcctcaacgacatcccagctcgatcatctaccggatcgtcgacgacaacctgcccaagt  
tcttgagaacaaggccaagtacgagtcctgaaggacaaggccccggagccatcaactacgagcagatcaagaaggacctggccg  
aggagctgacctcgacatcgactacaagaccagcggagtcaccagcgcgtcttctccctggacgaggtcttcgagatcgccaactcaa  
caactacctcaaccagtcggcatcaccaagttcaacaccatcatcgccggcaagttcgtcaacggcgagaacaccaagcgaaggga  
tcaacgagtacatcaacctgtactcccagcagatcaacgacaagaccctgaagaagtacaagatgtccgtctgttcaagcagatcctgcc  
gacaccgagtcgaagtccttcgcatcgacaagctggaggacgactccgacgtcgtcaccacctgacgtccttctacgagcagatcgccg  
ccttcaagaccgtcgaggagaagtcctcaaggagaccctgtccctgctgttcgacgacctgaaggcccagaagctggacctgtccaaga  
tctacttcaagaacgacaagtcctgaccgacctgtcccagcaggtcttcgacgactactccgtcatcgaccgccgctcctggagtacatc  
accagcagatcgccccgaagaacctggacaaccctccaagaaggagcaggagctgatcgccaagaagaccgagaaggccaagtac  
ctgtccctggagaccatcaagctggccctggaggagtcaacaagcaccgcgacatcgacaagcagtcgagggttcgaggagatcctggc  
caacttcgcccatcccgatgatcttcgacgagatcgcccagaacaaggacaacctggcccagatctccatcaagtaccagaaccaggg  
caagaaggacctgctgcaggcctccgccgaggacgacgtcaaggccatcaaggacctgctggaccagaccaacaacctgctgcacaag  
ctgaagatctccacatctcccagtcggagacaaggccaacatcctggacaaggacgagcacttctacctggtcttcgaggagtctactt  
cgagctggccaacatgctccgctgtacaacaagatccgcaactacatcaccagaagccctactccgacgagaagtcaagctgaacttc  
gagaactccaccctggccaacggctgggacaagaacaaggagccggacaacaccgccatcctgttcatcaaggacgacaagtactacct  
ggcgctcatgaacaagaagaacaacaagatcttcgacgacaaggccatcaaggagaacaaggcgagggtacaagaagatcgtgtac  
aagctgctgccggcgccaacaagatgctgccaaggtcttcttccgccaagtcctcaagtttacaaccctccgaggacatcctgc  
gcatccggaaacctccaccacaccaagaacggctcccccaagaagggtctacgagaagttcgagttcaacatcgaggactccgcaa  
gttcacgacttctacaagcagtcctatcctcaagcaccggagtggaaggacttcggcttccgcttctccgacaccagcggtaactcca  
tcgacgagttctaccgcgaggtcgagaaccagggtacaagctgacctcgagaacatctccgagtcctacatcgactccgtcgtcaacca  
gggcaagctgtacctgtccagatctacaacaaggacttctccgctactccaaggccgcccccaacctgcacacctgtactggaaggcc

ctgttcgacgagcggaaacctgcaggacgtcgtctacaagctgaacggcgaggccgagctgttctaccgcaagcagtcaccccgaagaa  
gatcaccaccccgccaaggaagccatcgccaacaagaacaaggacaacccgaagaaggagtccgtcttcgagtacgacctgatcaag  
gacaagcgggtcaccgaggacaagttcttctccactgccccatcacatcaactcaagtcctccggcgccaacaagtcaacgacgagat  
caacctgctgctgaaggagaaggccaacgacgtccacatcctgtccatcgaccggcgagcggcacctggcctactacacctggctg  
acggcaagggcaacatcatcaagcaggacacctcaacatcatcggaacgaccgatgaagaccaactaccacgacaagctggccgc  
catcgagaaggaccgactccgccggaaggactggaagaagatcaacaacatcaaggagatgaaggaggctacctgtcccaggtg  
gtccacgagatcgccaagctggatcagtagtacaacgccatcgtcgtcttcgaggacctgaactcggcttcaagcggcgccggttcaagg  
tcgagaagcagggttaccagaagctggagaagatgctgatcgagaagctgaactacctggtcttcaaggacaacgagttcgacaagaccg  
ggcgctcctgcggcctaccagctgaccgccccgttcgagacctcaagaagatgggcaagcagaccggcatcatctactacgtcccg  
gccggttcaactcgaagatctgccccgtcaccggttcgtcaaccagctgtacccaagtacgagtcgctccaagtcccaggagtctt  
ctccaagttcgacaagatctgtacaacctggacaaggggtacttcgagttctccttcgactacaagaactcggcgacaaggccccaag  
ggcaagtggaccatgcctcctcggctcccgcctgatcaactcgggaactccgacaagaaccacaactgggacaccgcgaggtctac  
ccgaccaaggagctggagaagctgctgaaggactactccatcgagtacggccacggcgagtgatcaaggccgcatctgcccggag  
ccgacaagaagttcttcgccaagctgacctggctcctgaacaccatcctgcagatgcgcaactccaagaccggcaccgagctggactacc  
tgatctccccgtcggcagctaacggcaacttctcactcccggcagggccccgaagaacatgccccaggacggcagccaacggc  
gcctaccacatcggcctgaaggcctgatgctgctgggcccgatcaagaacaaccaggaaggcaagaagctcaacctggatcaagaa  
cgaggagtacttcgagttcgtgcagaaccgcaacaactga

## References

1. Bierman M, Logan R, O'Brien K, Seno ET, Rao RN, Schonert BE. 1992. Plasmid cloning vectors for the conjugal transfer of DNA from *Escherichia coli* to *Streptomyces* spp. *Gene* 116:43-49.
2. Bush MJ, Bibb MJ, Chandra G, Findlay K, Buttner MJ. 2013 Genes required for aerial growth, cell division and chromosome segregation are targets of WhiA before sporulation in *Streptomyces venezuelae*. *mBio* 4:e00684-13.
3. Chater KF, Wilde LC. 1976 Restriction of a bacteriophage of *Streptomyces albus* G involving endonuclease *Sal* I. *J Bacteriol* 128:644-650.
4. Huang H, Zheng GS, Jiang WH, Hu HF, Lu YH. 2015 One-step high-efficiency CRISPR/Cas9-mediated genome editing in *Streptomyces*. *Acta Biochim Biophys Sin (Shanghai)* 47:231-243.
5. Kieser T, Bibb MJ, Butter MJ, Chater KF, Hopwood DA. 2000. The John Innes Foundation, Norwich, United Kingdom.
6. Li L, Zhao YW, Ruan LJ, Yang S, Ge M, Jiang WH, Lu YH. 2015 A stepwise increase in pristinamycin II biosynthesis by *Streptomyces pristinaespiralis* through combinatorial metabolic engineering. *Metab Eng* 29:12-25.
7. Li L, Zheng GS, Chen J, Ge M, Jiang WH, Lu YH. 2017 Multiplexed site-specific chromosomal engineering for overproducing bioactive secondary metabolites in actinomycetes. *Metab Eng* 40:80-92.
8. Ōmura S, Ikeda H, Ishikawa J, Hanamoto A, Takahashi C, Shinose M, Takahashi Y, Horikawa H, Nakazawa H, Osonoe T, Kikuchi H, Shiba T, Sakaki Y, Hattori M.

2001 Genome sequence of an industrial microorganism *Streptomyces avermitilis*: deducing the ability of producing secondary metabolites. Proc Natl Acad Sci USA 98: 12215–12220.

9. Zheng X, Li SY, Zhao GP, Wang J. 2017 An efficient system for deletion of large DNA fragments in *Escherichia coli* via introduction of both Cas9 and the non-homologous end joining system from *Mycobacterium smegmatis*. Biochem Biophys Res Commun 485:768-774.
